# Supplementary material for: Post-Operative Plasma Osteopontin Predicts Distant Metastasis in Human Colorectal Cancer
Source: PLoS One. 2015 May 11;10(5):e0126219. doi: 10.1371/journal.pone.0126219 (PMC4427310; doi:10.1371/journal.pone.0126219)
Supplement: S1 File — (XLSX) [file pone.0126219.s005.xlsx]

## Sheet: normal vs CRC
	Plasma OPN level (ng/ml)
normal donar #	normal donars	CRC patients	early stage	advance stage	CRC patient #
N1	69.8104	96.7554	96.7554		1
N2	117.732	125.837	125.837		2
N3	95.2286	119.694	119.694		3
N4	59.2505	70.7323	70.7323		4
N5	79.5702	106.81	106.81		5
N6	105.292	56.9816	56.9816		6
N7	127.465	102.811	102.811		7
N8	100.023	159.298	159.298		8
N9	84.1198	169.708	169.708		9
N10	133.753	140.721	140.721		10
N11	136.609	155.415	155.415		11
N12	148.091	167.713	167.713		12
N13	98.8521	88.8982	88.8982		13
N14	71.9451	120.424	120.424		14
N15	168.941	155.938	155.938		15
N16	139.525	206.825	206.825		16
N17	108.14	105.252	105.252		17
N18	128.532	159.415	159.415		18
N19	109.048	84.9033	84.9033		19
N20	93.4256	166.523		166.523	20
N21	99.2892	167.687	167.687		21
N22	105.272	93.4236	93.4236		22
N23	112.497	72.217	72.217		23
N24	133.118	113.489	113.489		24
N25	86.0106	255.617	255.617		25
N26	145.013	129.07	129.07		26
N27	117.07	191.819	191.819		27
N28	121.632	102.356	102.356		28
N29	264.609	240.553		240.553	29
N30	111.201	146.678		146.678	30
N31	120.835	79.9175	79.9175		31
N32	134.807	98.2082		98.2082	32
N33	162.221	94.859	94.859		33
N34	157.915	83.9677	83.9677		34
N35	133.005	125.563	125.563		35
N36	99.6549	193.366		193.366	36
N37	83.1845	255.49		255.49	37
N38	99.0647	170.234	170.234		38
N39	137.28	198.501		198.501	39
N40	66.213	166.056		166.056	40
N41	104.272	226.457		226.457	41
N42	102.617	124.873		124.873	42
N43	94.2119	303.26		303.26	43
N44	97.7832	174.027		174.027	44
N45	121.811	280.935		280.935	45
N46	137.617	259.837		259.837	46
N47	121.267	247.572		247.572	47
N48	118.946	213.09	213.09		48
N49	93.3753	100.647		100.647	49
N50	53.5174	132.758	132.758		50
N51	133.496	150.728	150.728		51
N52	115.952	442.997		442.997	52
N53	160.48	141.868		141.868	53
N54	111.742	117.887	117.887		54
N55	144.702	130.808		130.808	55
N56	77.9099	208.742	208.742		56
		135.037		135.037	57
		170.404		170.404	58
		112.045		112.045	59
		137.714		137.714	60
		263.135		263.135	61
		151.853	151.853		62
		187.969	187.969		63
		176.395	176.395		64
		36.3463	36.3463		65
		110.818		110.818	66
		118.883	118.883		67
		191.925	191.925		68
		233.206	233.206		69
		170.848	170.848		70
		181.91		181.91	71
		189.095		189.095	72
		150.888		150.888	73
		139.831		139.831	74
		263.831		263.831	75
		145.968		145.968	76
		194.657		194.657	77
		165.074		165.074	78
		153.534		153.534	79
		140.019		140.019	80
		245.737		245.737	81
		159.921		159.921	82
		182.148		182.148	83

## Sheet: Tissue vs Plasma
Patient #	OPN dCt	OPN fold to GAPDH	OPN (ng/ml)
36	7.14	0.00709	193.366
37	5.285	0.0256	255.49
38	8.546	0.0026755	170.234
39	5.716	0.019	198.501
40	9.673	0.001225	166.056
41	2.996	0.1253	226.457
42	7.422	0.0058312	124.873
43	7.129	0.0071443	303.26
44	7.365	0.0060662	174.027
46	4.461	0.0454	259.837
47	6.611	0.0102	247.572
48	5.93	0.0164	213.09
49	5.647	0.02	100.647
50	5.643	0.02	132.758
51	9.318	0.0015668	150.728
52	6.208	0.0135	442.997
53	9.003	0.0019491	141.868
54	10.125	0.00089551	117.887
55	8.082	0.0036904	130.808
56	6.475	0.0112	208.742
57	7.216	0.0067262	135.037
58	11.262	0.00040719	170.404
59	6.545	0.0107	112.045
60	8.705	0.0023963	137.714
61	6.417	0.0117	263.135
63	8.09	0.00367	187.969
64	10.744	0.00058309	176.395
65	12.981	0.00012369	36.3463
67	11.193	0.00042714	118.883
68	6.446	0.0115	191.925
69	11.008	0.00048558	233.206
70	9.272	0.0016175	170.848

## Sheet: Patient Data for table 1
Patient #	OPN (ng/ml)	Age	Gender (1=male; 2=female)	Tumor size (cm)	lymph node metastasis code (0=absent; 1=present)	Stage	Metastasis code (0=absent; 1=present)
1	96.7554	68	1	4	0	2	0
2	125.837	77	2	6	0	2	0
3	119.694	75	1	0.5	0	2	0
4	70.7323	74	1	5	1	3	0
5	106.81	73	2	2.5	0	1	0
6	56.9816	80	1	4	0	1	0
7	102.811	73	1	2.5	1	3	0
8	159.298	88	1	4	0	1	0
9	169.708	82	1	5	1	3	0
10	140.721	73	1	3.5	1	3	0
11	155.415	87	2	10	0	2	0
12	167.713	79	1	5	1	3	0
13	88.8982	66	1	5	1	3	0
14	120.424	87	1	3.5	1	3	0
15	155.938	81	1	5	0	2	0
16	206.825	79	2	5.5	0	2	0
17	105.252	73	1	3.5	0	2	0
18	159.415	68	2	3	0	2	0
19	84.9033	76	1	0	0	2	0
20	166.523	80	2	9	1	4	1
21	167.687	70	1	3.5	1	3	0
22	93.4236	59	1	0	0	2	0
23	72.217	67	2	4	1	3	0
24	113.489	53	1	2	0	2	0
25	255.617	64	1	9	1	3	0
26	129.07	60	2	8	1	3	0
27	191.819	64	1	5.5	0	2	0
28	102.356	60	2	1.5	0	1	0
29	240.553	45	1	12	1	3	0
30	146.678	48	2	4	1	3	1
31	79.9175	22	1	2.5	0	1	0
32	98.2082	81	2	3	1	3	0
33	94.859	57	2	0.1		2	0
34	83.9677	61	2	2.5	1	2	0
35	125.563	28	2	7.5	0	2	0
36	193.366	72	2	2.5	1	3	0
37	255.49	76	1	2.2	0	3	0
38	170.234	79	1	4	0	1	0
39	198.501	74	1	4	1	4	1
40	166.056	59	1	4	1	3	0
41	226.457	73	2	7	0	4	1
42	124.873	54	1	4	1	3	0
43	303.26	73	1	7	1	3	0
44	174.027	69	2	4	1	4	1
45	280.935	59	1	6	1	3	0
46	259.837	65	2	3	1	4	1
47	247.572	71	1	4	1	4	1
48	213.09	83	1	4	0	1	0
49	100.647	56	1	4	1	3	0
50	132.758	38	2	6	0	2	0
51	150.728	65	1	4	0	2	0
52	442.997	76	2	6.5	0	4	1
53	141.868	66	1	8	1	3	0
54	117.887	61	1	4.5	0	2	0
55	130.808	62	1	3	1	3	0
56	208.742	78	2	4	0	2	0
57	135.037	72	1	5.5	1	3	0
58	170.404	80	1	3	1	3	0
59	112.045	74	1	4	1	3	0
60	137.714	79	1	2	0	4	1
61	263.135	79	1	6	1	3	0
62	151.853	58	1	4	0	2	0
63	187.969	67	1	6	0	2	0
64	176.395	70	1	5	0	2	0
65	36.3463	62	1	3	0	2	0
66	110.818	78	1	6	1	3	0
67	118.883	76	1	2	0	1	0
68	191.925	59	1	8.5	0	2	0
69	233.206	34	1	12.5	0	2	0
70	170.848	66	2	6.5	0	2	0
71	181.91	74	1	5	1	4	1
72	189.095	58	1	8	0	4	1
73	150.888	78	1		0	4	1
74	139.831	62	1	9	1	4	1
75	263.831	41	2	3	1	4	1
76	145.968	65	1	6	0	4	1
77	194.657	64	1			4	1
78	165.074	60	1		1	4	1
79	153.534	54	1	7	1	4	1
80	140.019	37	1	6	1	4	1
81	245.737	80	2	9	1	4	1
82	159.921	64	1	9	1	4	1
83	182.148	57	2	3		4	1

## Sheet: post-op OPN predict metastasis
Patient #	Post-operative OPN (ng/ml)	Post-operative OPN status (0=low; 1=high)	Development of post-operative metastasis (0=absent; 1=present)
M1	143.62	0	1
M2	132.213	0	1
M3	257.532	1	1
M4	96.7408	0	1
M5	155.582	1	1
M6	106.15	0	1
M7	178.27	1	1
M8	239.707	1	1
M9	192.146	1	1
M10	203.361	1	1
M11	216.79	1	1
M12	153.808	1	1
M13	124.027	0	1
M14	214.698	1	1
M15	368.818	1	1
M16	306.932	1	1
M17	206.122	1	1
M18	147.448	0	1
M19	218.138	1	1
M20	78.7902	0	1
M21	69.0601	0	1
M22	209.881	1	1
M23	187.239	1	1
M24	187.821	1	1
M25	228.57	1	1
M26	217.539	1	1
M27	317.269	1	1
M28	159.564	1	1
M29	190.345	1	1
M30	177.263	1	1
M31	166.637	1	1
M32	236.102	1	1
M33	170.815	1	1
M34	151.434	0	1
M35	237.37	1	1
M36	153.016	1	1
M37	271.271	1	0
M38	129.142	0	0
M39	98.4465	0	0
M40	94.3205	0	0
M41	186.029	1	0
M42	100.887	0	0
M43	104.937	0	0
M44	130.134	0	0
M45	99.1304	0	0
M46	126.355	0	0
M47	209.336	1	0
M48	175.778	1	0
M49	148.373	0	0
M50	150.97	0	0
M51	250.742	1	1
M52	143.666	0	0
M53	128.197	0	0
M54	236.102	1	0
M55	101.188	0	0
M56	81.4567	0	0
M57	142.058	0	0
M58	194.877	1	1
M59	184.917	1	0
M60	403.663	1	0
M61	142.839	0	0
M62	144.034	0	1
M63	226.004	1	0
M64	88.8878	0	1
M65	201.393	1	0
M66	93.0092	0	0
M67	112.91	0	0
M68	153.389	1	0
M69	143.574	0	0
M70	136.981	0	0
M71	100.072	0	0
M72	115.901	0	0
M73	117.712	0	0
M74	200.214	1	0
M75	180.817	1	0
M76	162.197	1	0
M77	271.41	1	0
M78	91.844	0	0
M79	65.5709	0	0
M80	204.387	1	0
M81	143.928	0	0
M82	48.2483	0	0
M83	97.7427	0	0
M84	86.5083	0	0
M85	264.393	1	0
M86	92.0322	0	0
M87	102.4	0	0
M88	60.2656	0	0
M89	78.7235	0	0

## Sheet: For univariate and multivariate
Patient #	Age (0=<65; 1=>or =65)	Gender (1=male; 2=female)	Pre-op OPN (ng/ml)	Pre-op OPN level (0=low; 1=high)	Post-op OPN (ng/ml)	Post-op OPN level (0=low; 1=high)	Tumor size (cm)	Tumor size code (0=<5; 1=>or= 5	Stage code (1=1-2; 2=3)	Metastasis code (0=absent; 1=present)	lymph node metastasis code (0=absent; 1=present)	pre-op CEA	post-op CEA	Pre-op CEA level (0=low; 1=high)	Post-op CEA level (0=low; 1=high)	Disease free survival (DFS; months)	DFS status (0=Censor; 1=Event)
1	1	1	96.7554	0	115.901	0	4	0	1	0	0	0.9	0.9	0	0	12	0
2	1	2	125.837	1	128.197	0	6	1	1	0	0	1.7	1.7	0	0	12	0
3	1	1	119.694	0	112.91	0	0.5	0	1	0	0	3.9	4.3	0	1	8.5	0
4	1	1	70.7323	0	88.8878	0	5	1	2	0	0	1.4	1.6	0	0	30	1
5	1	2	106.81	0	143.574	0	2.5	0	1	0	0	2.3	1.7	0	0	5.5	0
6	1	1	56.9816	0	101.188	0	4	0	1	0	0	2.8	2.8	0	1	4.5	0
7	1	1	102.811	0	153.389	1	2.5	0	2	0	1	6.8	4.7	1	1	9	0
8	1	1	159.298	1	209.336	1	4	0	1	0	0	1.3	1.3	0	0	9	0
9	1	1	169.708	1	250.742	1	5	1	2	0	0	4.4	3.5	1	1	10.5	1
10	1	1	140.721	1	144.034	1	3.5	0	2	0	1	86	2.6	1	1	11	1
11	1	2	155.415	1	126.355	0	10	1	1	0	0	33	1.3	1	0	9	0
13	1	1	88.8982	0	142.839	0	5	1	2	0	1	1.6	1.4	0	0	7	0
14	1	1	120.424	0	236.102	1	3.5	0	2	0	1	5.4	1.5	1	0	11	0
15	1	1	155.938	1	175.778	1	5	1	1	0	0	14	4.5	1	1	9.5	0
16	1	2	206.825	1	226.003	1	5.5	1	1	0	0	3.5	3.2	0	1	6	0
17	1	1	105.252	0	151.434	1	3.5	0	1	0	0	15.3	15.3	1	1	1	1
18	1	2	159.415	1	200.214	1	3	0	1	0	0	5.4	1.2	1	0	5	0
21	1	1	167.687	1	180.817	1	3.5	0	2	0	1	1	0.7	0	0	8.5	0
21	1	1	167.713	1	194.877	1	5	1	2	0	1	113	4.4	1	1	13.5	1
22	1	1	93.4236	0	148.373	1	0	0	1	0	0	6.8	5.9	1	1	6	0
24	0	1	113.489	0	150.97	1	2	0	1	0	0	0.9	1.3	0	0	9	0
26	1	2	129.07	1	201.393	1	8	1	2	0	1	1.5	19.9	0	1	7	0
27	1	1	191.819	1	403.663	1	5.5	1	1	0	0	0.9	0.9	0	0	8	0
28	1	2	102.356	0	166.637	1	1.5	0	1	0	0	4.6	0.9	1	0	2	1
29	0	1	240.553	1	184.916	1	12	1	2	0	1	90	20.1	1	1	3.5	0
30	0	2	146.678	1	170.815	1	4	0	2	0	1	9	5.9	1	1	4	1
31	0	1	79.9175	0	117.712	0	2.5	0	1	0	0	1	0	0	0	4.5	0
32	1	2	98.2082	0	142.058	0	3	0	2	0	1	4.3	1.4	0	0	6.5	0
34	1	2	83.9677	0	81.4567	0	2.5	0	1	0	1	1.9	1.9	0	0	11	0
35	0	2	125.563	1	93.0092	0	7.5	1	1	0	0	86	0.8	1	0	8.5	0
53	1	1	141.868	1	145.141	1	8	1	2	0	1	1.2	1.4	0	0	12	1
84	1	1	365.487	1	271.41	1	7	1	2	0	1	11	1.1	1	0	7	0
85	0	1	60.9132	0	91.844	0	6	1	1	0	0	4.3	3.1	0	1	10	0
86	1	2	54.9677	0	65.5709	0	2.5	0	2	0	1	14	1.3	1	0	18	0
87	1	2	164.413	1	204.387	1	2	0	1	0	0	1.5	1.5	0	0	30	0
88	0	2	122.632	0	143.928	1	1	0	1	0	0	1.1	2	0	1	22.5	0
89	1	2	50.7562	0	48.2483	0	5.5	1	2	0	1	9	9	1	1	30	0
90	1	1	142.382	1	97.7427	0	3	0	1	0	0	9	2.3	1	1	2.5	0
91	1	2	107.002	0	86.5083	0	2	0	1	0	0	4.4	2	1	1	9.5	0
92	1	1	267.893	1	264.393	1	5	1	2	0	1	12	2.1	1	1	10	0
93	1	2	165.265	1	92.0322	0	4	0	2	0	1	10	2.3	1	1	30	0
94	1	1	41.9458	0	102.4	0	2	0	1	0	0	2.6	2.6	0	1	19	0
95	1	2	105.35	0	60.2656	0	3	0	1	0	0	9	2.3	1	1	30	0
96	1	1	127.54	1	78.7235	0	3.5	0	1	0	0	4.6	2.5	1	1	8	0
