# Supplementary material for: Post-Operative Plasma Osteopontin Predicts Distant Metastasis in Human Colorectal Cancer
Source: PLoS One. 2015 May 11;10(5):e0126219. doi: 10.1371/journal.pone.0126219 (PMC4427310; doi:10.1371/journal.pone.0126219)
Supplement: S2 File — (XLSX) [file pone.0126219.s006.xlsx]

## Sheet: OPN transcript level
		delta Ct (OPN-GAPDH)						OPN expression (Fold to vector)					OPN expression (Fold to siCTL)
		SW480	SW620	DLD1	HCT116		OPN	DLD1-Vc	DLD1-OPN#1	DLD1-OPN#3			DLD1-OPN#1
	1st trial	10.8569	8.56496	12.3513	8.03705		1st trial	1	6.8035	2.91681		OPN	siCTL	siOPN
	2nd trial	9.11647	6.87034	12.8994	7.02541		2nd trial	1	7.26322	3.42108		1st trial	1	0.320533
	3rd trial	9.73976	8.48161	11.0198	7.79393		3rd trial	1	6.37288	2.48687		2nd trial	1	0.247672
							E-Cad					3rd trial	1	0.3431
							1st trial	1	0.379142	0.529231		E-Cad
							2nd trial	1	0.352795	0.383982		1st trial	1	2.23546
		1/delta Ct					3rd trial	1	0.307131	0.527946		2nd trial	1	2.54486
		SW480	SW620	DLD1	HCT116		Twist					3rd trial	1	1.96368
	1st trial	0.0809632	0.0921074	0.116755	0.124424		1st trial	1	5.7902	3.58386		Twist
	2nd trial	0.0775228	0.109692	0.145553	0.14234		2nd trial	1	6.99794	3.70121		1st trial	1	0.279388
	3rd trial	0.0907456	0.102672	0.117902	0.128305		3rd trial	1	5.50329	3.47022		2nd trial	1	0.236479
							Snail					3rd trial	1	0.283531
							1st trial	1	8.55133	3.3286		Snail
							2nd trial	1	7.66981	6.57952		1st trial	1	0.16388
							3rd trial	1	4.76708	4.427		2nd trial	1	0.147046
												3rd trial	1	0.19228
								DLD1-Vc	DLD1-OPN#1	DLD1-OPN#3
							OPN	delta Ct (OPN-GAPDH)
							1st trial	9.14077	6.37449	7.59638			DLD1-OPN#1
							2nd trial	9.25461	6.394	7.48016			siCTL	siOPN
							3rd trial	9.02694	6.35499	7.71261		OPN	delta Ct (OPN-GAPDH)
							E-Cad					1st trial	6.36404	8.0055
							1st trial	13.823	15.2222	14.7411		2nd trial	6.34594	8.35943
							2nd trial	13.7843	15.2874	15.1652		3rd trial	6.70653	8.24982
							3rd trial	13.8618	15.5649	14.7833		E-Cad
							Twist					1st trial	12.243	11.0824
							1st trial	20.5077	17.9741	18.6662		2nd trial	12.3749	11.0273
							2nd trial	20.3866	17.5797	18.4986		3rd trial	12.1111	11.1375
							3rd trial	20.8288	18.3685	19.0337		Twist
							Snail					1st trial	18.6738	20.5134
							1st trial	17.3375	14.2414	15.6026		2nd trial	18.5535	20.6337
							2nd trial	17.2217	14.2825	14.5037		3rd trial	18.7941	20.6125
							3rd trial	16.4533	14.2002	14.307		Snail
												1st trial	22.6448	25.2541
												2nd trial	21.4106	24.1763
												3rd trial	22.8791	25.2578

## Sheet: OPN secretory level (ng per ml)
		DLD1	SW480	SW620	HCT116			DLD1-V1	DLD1-OPN#1	DLD1-OPN#3			DLD1-OPN#1
	1st trial	0.358374	5.5585	289.054	293.368		1st trial	6.35606	265.399	186.208			siCTL	siOPN
	2nd trial	0.316614	3.26584	283.619	303.293		2nd trial	5.84085	282.469	185.985		1st trial	279.1	121
	3rd trial	0.401289	8.09827	294.513	283.521		3rd trial	8.34756	267.049	178.863		2nd trial	261.671	83.298
												3rd trial	259.49	96.6899

## Sheet: Migration
10% FBS containing complete medium as chemoattractant													1:1 complete medium with cultured medium (as source of secreted OPN) as chemoattractant
													1st trial
	1st trial	1	2	average			1st trial	1	2	average			Medium from		1	2	average			1st trial	1	2	average
DLD1 stable clone	Vector	112	100	106		DLD1-OPN1	siCTL	3000	2800	2900			DLD1 stable clone	Vector	53	75	64		DLD1-OPN1	siCTL	520	520	520
	OPN1	2560	1500	2030			siOPN	1200	1160	1180				OPN1	760	600	680			siOPN	52	65	58.5
	OPN3	2000	1800	1900										OPN3	320	420	370
													2nd trial
	2nd trial	1	2	average			2nd trial	1	2	average			Medium from		1	2	average			2nd trial	1	2	average
DLD1 stable clone	Vector	134	180	157		DLD1-OPN1	siCTL	2900	3200	3050			DLD1 stable clone	Vector	94	71	82.5		DLD1-OPN1	siCTL	380	300	340
	OPN1	3120	2140	2630			siOPN	950	1000	975				OPN1	680	620	650			siOPN	80	76	78
	OPN3	2100	2850	2475										OPN3	340	360	350
													3rd trial
	3rd trial	1	2	average			3rd trial	1	2	average			Medium from		1	2	average			3rd trial	1	2	average
DLD1 stable clone	Vector	174	158	166		DLD1-OPN1	siCTL	3100	2700	2900			DLD1 stable clone	Vector	48	61	54.5		DLD1-OPN1	siCTL	260	260	260
	OPN1	2200	2500	2350			siOPN	850	620	735				OPN1	640	680	660			siOPN	80	60	70
	OPN3	2000	1840	1920										OPN3	440	340	390

## Sheet: invasion
		1st trial	1	2	average
	DLD1 stable clone	Vector	220	180	200
		OPN1	215	205	210
		OPN3	195	187	191
		2nd trial	1	2	average
	DLD1 stable clone	Vector	195	205	200
		OPN1	160	177	168.5
		OPN3	185	172	178.5
		3rd trial	1	2	average
	DLD1 stable clone	Vector	177	192	184.5
		OPN1	200	188	194
		OPN3	205	180	192.5

## Sheet: proliferation
				DLD1 stable clone
				Vector	OPN#1	OPN#3
			1st trial	449.678	476.696	430.663
			2nd trial	462.077	391.323	434.736
			3rd trial	414.983	412.368	398.527

## Sheet: transfection qPCR results
	OPN			blanked	Fold	OPN			blanked	Fold	OPN			blanked	Fold
	1	V1	77.139	34.839	1	1	V1	76.816	20.166	1	1	V1	15.789	1.527	1
	2	O1	99.78	57.48	1.64988	2	V2	75.18	18.53		2	O1	19.229	4.967	3.25278
	3	O3	121.154	78.854	2.26338	3	O1	95.593	38.943	2.10162	3	O3	22.12	7.858	5.14604
	4	siCTL	92.931	45.48	1	4	O1	87.65	31	1.67296	4	siCTL	16.956	2.694	1
	5	siOPN	79.099	31.648	0.695866	5	O3	85.566	28.916	1.5605	5	siOPN	15.698	1.436	0.533036
	6	blank	42.3			6	siCTL	76.395	19.997	1	6	siCTL	14.74	2.665	1
	7	blank	47.451			7	siOPN	67.732	11.334	0.566785	7	siOPN	13.229	1.154	0.433021
						8	blank	56.65			8	blank	14.262
						9	blank	56.398			9	blank	12.075
E-cad				blanked	Fold	E-cad			blanked	Fold	E-cad			blanked	Fold
1	8	V1	174.017	89.555	1	1	V1	56.338	45.909	1	1	V1	132.391	90.722	1
	9	O1	138.897	54.435	0.607839	2	O1	18.346	7.917	0.17245	2	O1	92.254	50.585	0.557583
	10	O3	134.82	50.358	0.562314	3	O3	45.72	35.291	0.768716	3	O3	83.494	41.825	0.461024
	11	siCTL	89.463	3.088	1	4	V1	23.334	13.609	1	4	V1	92.692	51.023	1
	12	siOPN	99.29	12.915	4.18232	5	O1	9.839	0.114	0.00837681	5	O1	47.889	6.22	0.121906
	13	blank	84.462			6	O3	13.708	3.983	0.292674	6	O3	48.472	6.803	0.133332
	14	blank	86.375	blanked	Fold	7	blank	10.429			7	blank	41.669
2	15	V1	110.928	26.466	1	8	blank	9.725
	16	O1	95.285	10.823	0.40894	E-cad			blanked	Fold	E-cad				Fold
	17	O3	98.518	14.056	0.531097	1	siCTL	35.456	19.199	1	1	siCTL	78.291	19.02	1
	18	siCTL	115.817	29.442	1	2	siOPN	60.248	43.991	2.29132	2	siOPN	108.034	48.763	2.56377
	19	siOPN	140.902	54.527	1.85201	3	siCTL	87.109	20.852	1	3	blank	59.271
						4	siOPN	107.019	40.762	1.95482	1	siCTL	11.537	6.537	1
						5	blank	16.257			2	siOPN	23.63	18.63	2.84993
											3	blank	10.657
GAPDH				blanked	Fold	GAPDH				Fold	GAPDH					Fold
	20	V1	169.014	87.917	1	1	V1	66.579	54.764	1		1	V1	95.351	82.722	1
	21	O1	148.175	67.078	0.76297	2	O1	77.171	65.356	1.19341		2	O1	97.699	85.07	1.02838
	22	O3	159.322	78.225	0.88976	3	O3	65.53	53.715	0.980845		3	O3	92.275	79.646	0.962815
	23	siCTL	121.74	74.548	1	4	blank	11.815				4	blank	12.629
	24	siOPN	121.352	74.16	0.994795
	25	blank	81.097			1	siCTL	85.259	69.052	1		1	siCTL	122.678	111.105	1
	26	blank	47.192			2	siOPN	84.649	68.442	0.991166		2	siOPN	121.302	109.729	0.987615
						3	blank	16.207				3	blank	11.573
